# Supplementary material
Source: publisher figshare collection journal article supplement (https://acs.figshare.com/ndownloader/files/5073427)
Supplement: Supplementary file 1 [file 5073427]

Supporting Information for

Self-Association of Amphiphilic Statistical Copolymers of Sodium 2-(Acrylamido)-2-methylpropanesulfonate and *n*-Hexyl Methacrylate in Aqueous Media

Akihito Hashidzume, Atsushi Kawaguchi, Akiyo Tagawa, Katsuhiro Hyoda, and Takahiro Sato

*Department of Macromolecular Science, Osaka University, 1-1 Machikaneyama-cho, Toyonaka, Osaka 560-0043, Japan*

**Preparation of 1-Cyano-1-methylethyl Dithiobenzoate (CMEDTB).** CMEDTB was prepared by a slight modification of the procedure of Thang et al.<sup>1</sup>

2,2'-Azobisisobutyronitrile (AIBN) (7.0 g, 43 mmol) and di(thiobenzoyl)disulfide (9.0 g, 29 mmol), prepared according to the procedure of Mitsukami et al.,<sup>2</sup> were dissolved in benzene (100 mL). The reaction solution was heated under an argon atmosphere at 65 °C for 24 h and then at 80 °C for 12 h to complete the decomposition of AIBN. After evaporation of the solvent under reduced pressure, a red viscous oil was obtained. CMEDTB was purified by column chromatography (silicagel 60 Å, 70 – 230 mesh) using a THF/hexane mixed solvent (1/30, v/v) as eluent three times. Fractions that were red in color were combined and the solvent was evaporated to obtain CMEDTB; yield 7.0 g, 54 %; mp 29.1 – 29.6 °C. <sup>1</sup>H NMR (CDCl<sub>3</sub>, 400 MHz): δ 1.94 (s, 6H, CH<sub>3</sub>), 7.39 (m, 2H, ortho), 7.56 (m, 1H, para), 7.92 (m, 2H, meta). <sup>13</sup>C

NMR (CDCl<sub>3</sub>, 100 MHz):  $\delta$  26.6 (CH<sub>3</sub>), 41.8 ((CH<sub>3</sub>)<sub>2</sub>CCN), 119.8 (C $\equiv$ N), 126.5 (meta), 128.4 (ortho), 132.7 (para), 144.4 (ipso), 222.8 (C=S). Anal. Calcd for C<sub>11</sub>H<sub>11</sub>NS<sub>2</sub>: C, 59.69; H, 5.01; N, 6.33. Found: C, 59.65; H, 4.95; N, 6.70.

## References

- (1) Thang, S. H.; Chong, Y. K.; Mayadunne, R. T. A.; Moad, G.; Rizzardo, E. *Tetrahedron Lett.* **1999**, *40*, 2435-2438.
- (2) Mitsukami, Y.; Donovan, M. S.; Lowe, A. B.; McCormick, C. L. *Macromolecules* **2001**, *34*, 2248-2256.
